# Supplementary material for: Reversible switching of solid-state luminescence by heat-induced interconversion of molecular packing
Source: Royal Society of Chemistry journal article supplement (doi:10.1039/c7me00089h), 2017-10-23
Supplement: c7me00089h1.pdf [file c7me00089h1.pdf]

## Supporting information

### **Reversible Switching of Solid-State Luminescence by Heat-Induced Interconversion of Molecular Packing**

Karattu Chali Naeem,<sup>a,b</sup> and Vijayakumar C. Nair<sup>\*a,b</sup>

<sup>a</sup>Photosciences and Photonics Section, CSIR-National Institute for Interdisciplinary Science and Technology (NIIST), Trivandrum 695 019, India.

<sup>b</sup>Academy of Scientific and Innovative Research (AcSIR), CSIR-NIIST Campus, Thiruvananthapuram 695019, Kerala, India.

E-mail: [cvijayakumar@niist.res.in](mailto:cvijayakumar@niist.res.in)

## Table of contents

**Scheme S1:** Synthesis of **DBBO** and **DBBT**

**Fig. S1:** Absorption spectra, emission spectra and time-resolved fluorescence decay profile of **DBBO** and **DBBT** recorded in various solvents

**Table S1:** Photophysical parameters of **DBBO** and **DBBT** in various solvents

**Fig. S2:** Photoluminescence spectra, photographs, fluorescence microscopy images and FE-SEM images of **DBBT** under different conditions

**Fig. S3:** Emission spectra taken for P-state and H-state powders of **DBBO** and **DBBT** after dissolved in THF

**Fig. S4:** Fluorescent image recorded on a filter paper coated with **DBBO** and **DBBT**

**Fig. S5:** DSC thermogram, temperature dependent XRD pattern and solid state absorption spectra of **DBBT**

**Fig. S6:** Time-resolved fluorescence decay profile of **DBBT** at different states

**Table S2:** Average fluorescence life time of **DBBO** and **DBBT** at different states

**Fig. S7:** PXRD pattern under different conditions of **DBBO** and **DBBT**

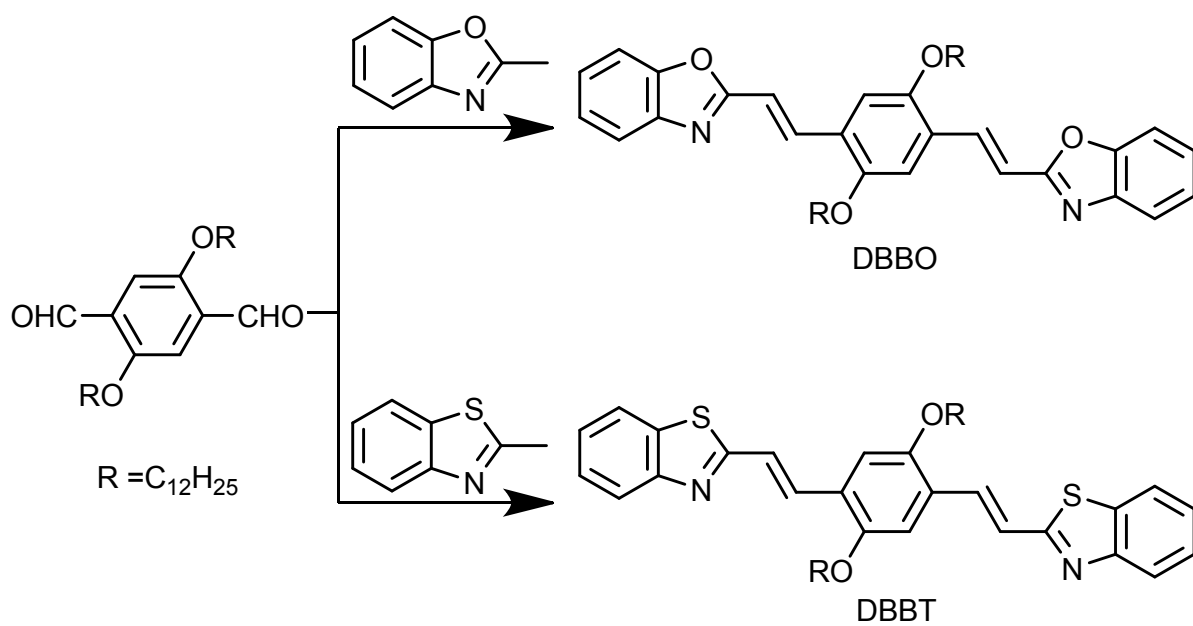

**Scheme S1:** Synthesis of **DBBO** and **DBBT**; *Reagents and conditions:* *t*-BuOK, 0 °C, dry THF, 2h

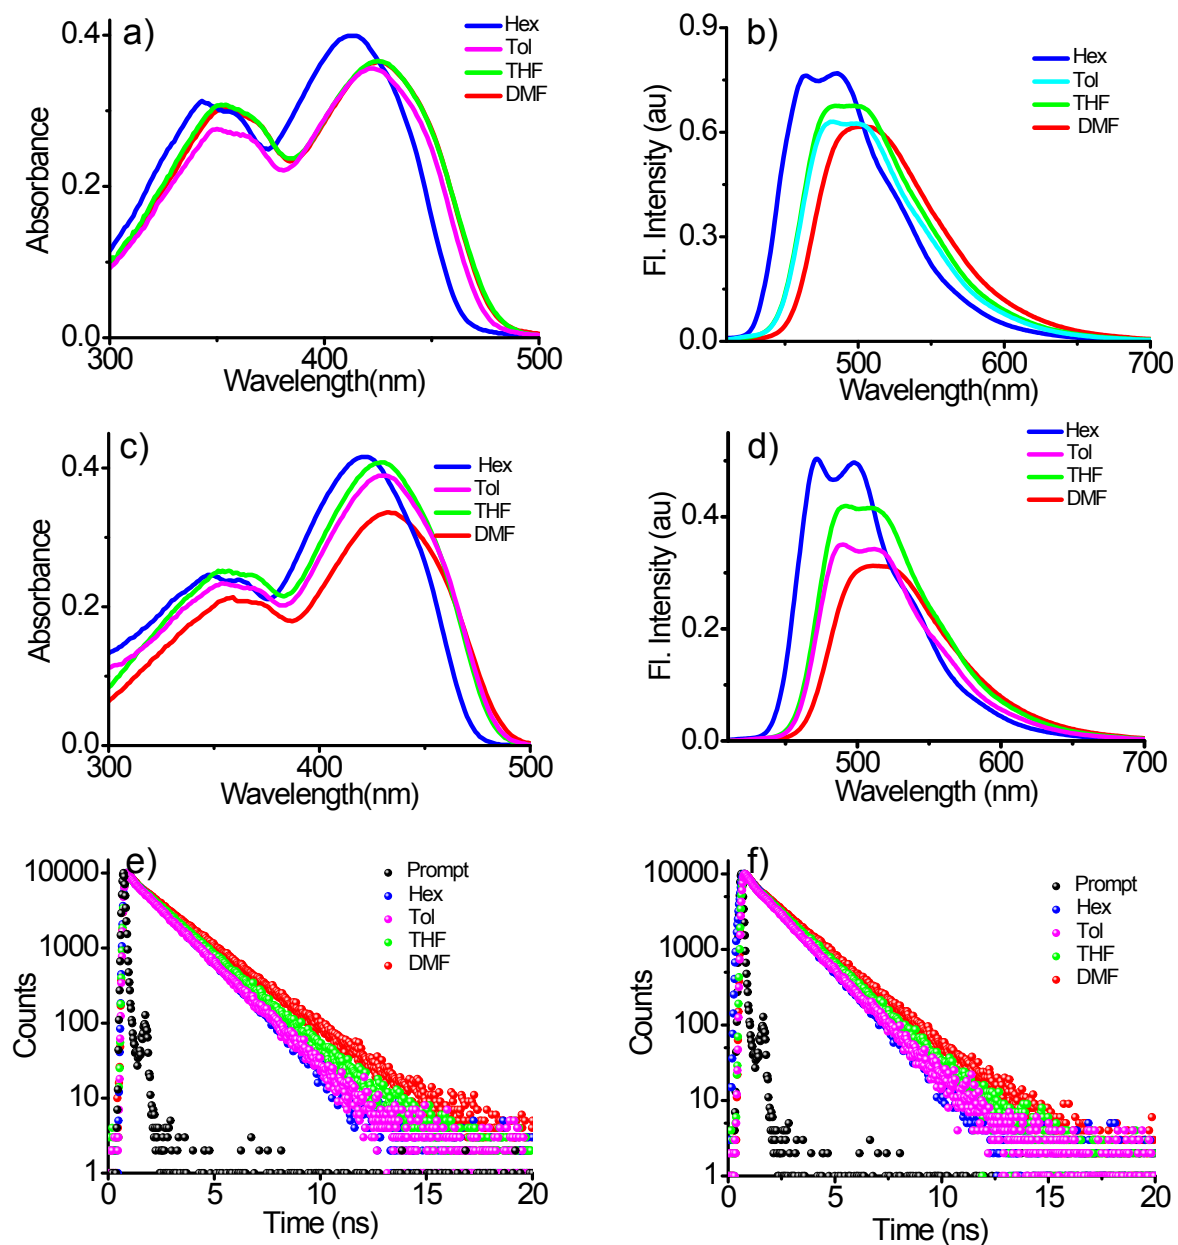

**Fig.S1:** Absorption spectra of (a) **DBBO** and (b) **DBBT**; emission spectra of (c) **DBBO** and (d) **DBBT**; time-resolved fluorescence decay profile of (e) **DBBO** and (f) **DBBT** recorded in various solvents.

**Table S1:** Absorption maximum, extinction coefficient ( $\epsilon$ ), emission maximum, fluorescence quantum yield ( $\Phi_f$ ) and average fluorescence lifetime ( $\tau_f$ ) of **DBBO** and **DBBT** in various solvents.

| Compound    | Solvent | $\lambda_{\text{abs}}$<br>(nm) | $\epsilon \times 10^5$<br>( $\text{cm}^{-1}$ ) | $\lambda_{\text{em}}$<br>(nm) | $\Phi_f$ | $\tau_f$<br>(ns) |
|-------------|---------|--------------------------------|------------------------------------------------|-------------------------------|----------|------------------|
| <b>DBBO</b> | Hexane  | 354,413                        | 0.29,0.40                                      | 462,486                       | 0.77     | 1.54             |
|             | Toluene | 352,422                        | 0.27,0.36                                      | 484,500                       | 0.78     | 1.55             |
|             | THF     | 352,426                        | 0.30,0.37                                      | 481,500                       | 0.82     | 1.73             |
|             | DMF     | 352,426                        | 0.30,0.37                                      | 504                           | 0.79     | 2.00             |
| <b>DBBT</b> | Hexane  | 360,421                        | 0.24,0.42                                      | 471,497                       | 0.80     | 1.47             |
|             | Toluene | 359,429                        | 0.25,0.41                                      | 490,511                       | 0.84     | 1.50             |
|             | THF     | 361,430                        | 0.23,0.39                                      | 488,514                       | 0.88     | 1.62             |
|             | DMF     | 362,432                        | 0.21,0.33                                      | 514                           | 0.84     | 1.82             |

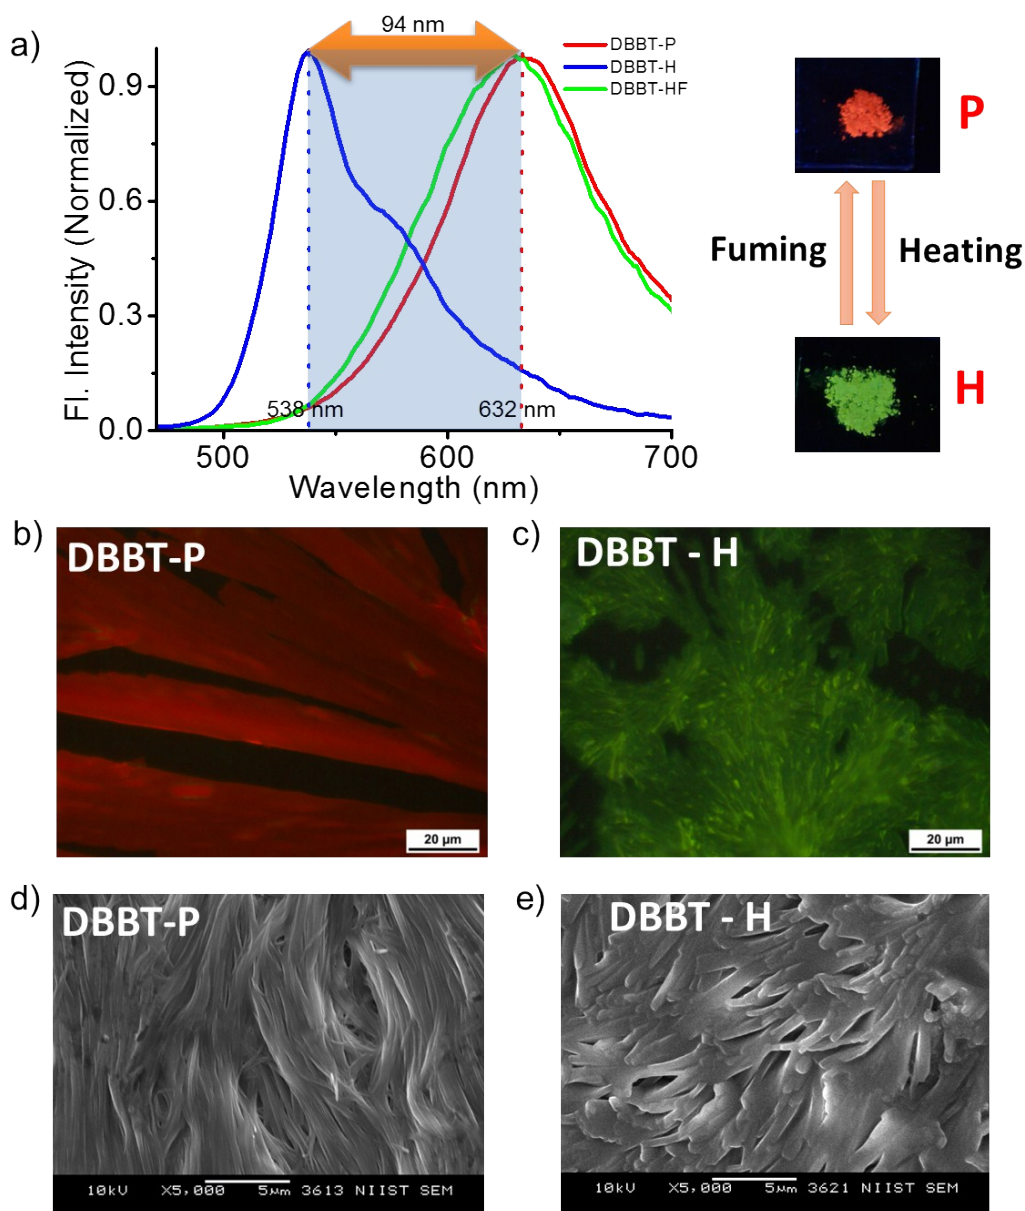

**Fig.S2:** (a) Photoluminescence spectra of **DBBT** under different conditions; P – pristine powder sample, H – sample heated at 80 °C followed by air cooled to room temperature and HF – sample H on fuming with dichloromethane. Photographs of the pristine and heated samples under 365 nm UV light are shown at the right side. Fluorescence microscopy images of the (b) pristine and (c) heated samples of **DBBT** under excitation by UV source. FE-SEM images of self-assembled structures of (d) pristine and (e) heated samples of **DBBT**.

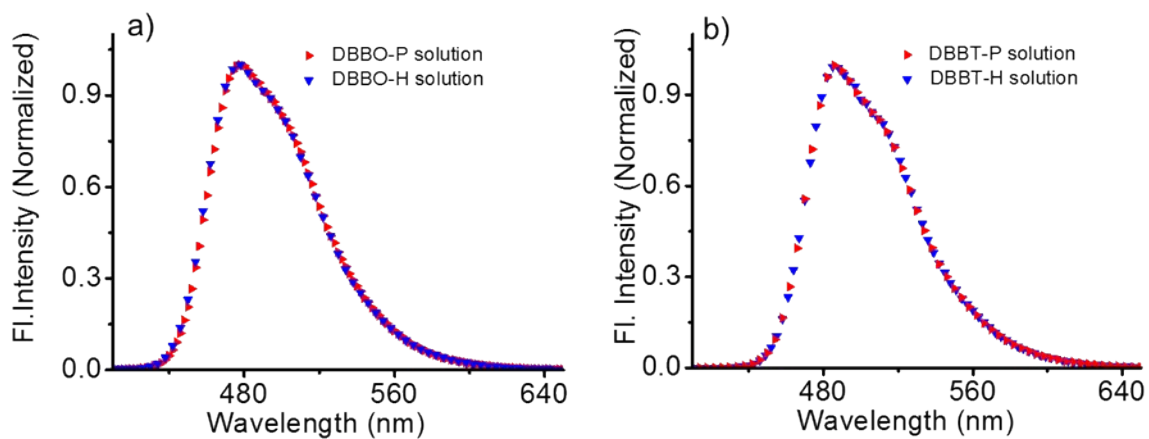

**Fig. S3:** Emission spectra taken for P-state and H-state powders dissolved in THF of a) **DBBO** and b) **DBBT**

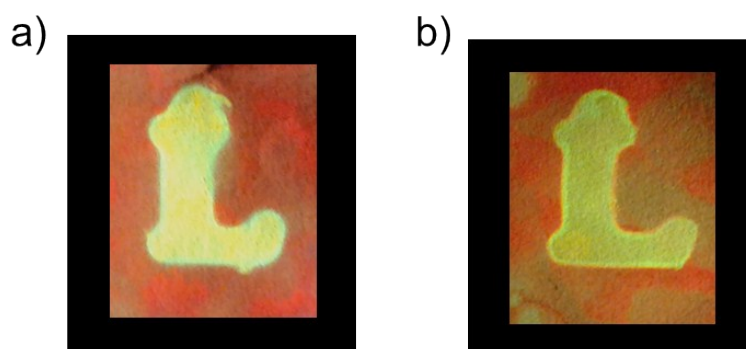

**Fig.S4:** Fluorescent image recorded on a filter paper coated with a) **DBBO** and b) **DBBT** by keeping a hot metallic letter 'L', which was then removed, under 365 nm UV lamp.

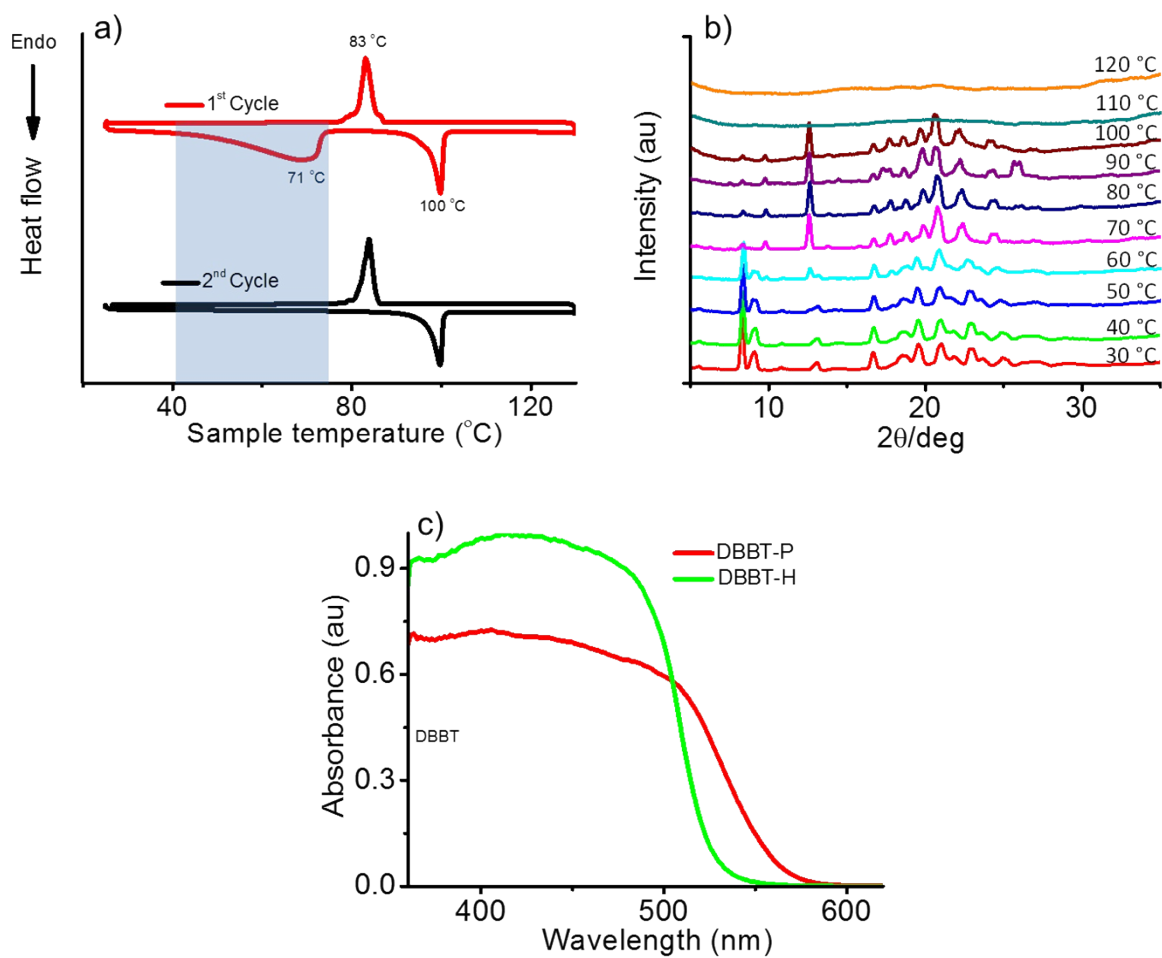

**Fig.S5:** a) First and second heating cycle of DSC thermogram, b) temperature dependent XRD pattern and c) solid-state absorption spectra of P-form and H-form of **DBBT**.



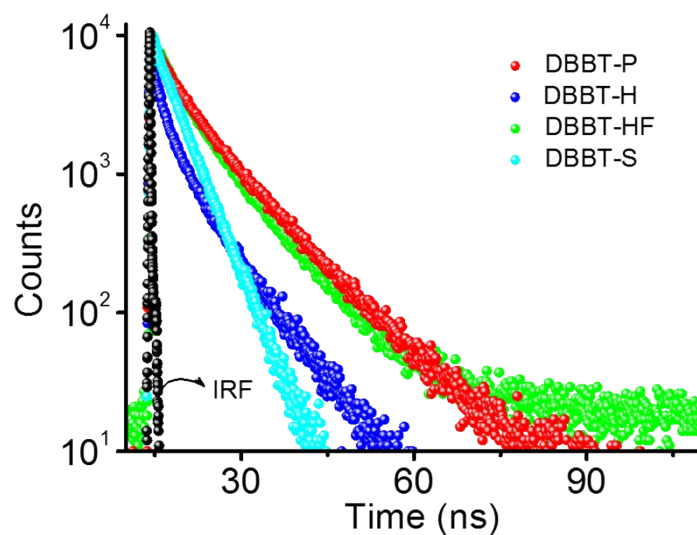

**Fig.S6:** Time-resolved fluorescence decay profile of **DBBT** at different states P – Pristine powder sample, H – heated sample and HF – H powder on fuming with dichloromethane; S – Molecularly dissolved state (IRF – Instrument response factor).

**Table S2.** Average fluorescence life time of **DBBO** and **DBBT** at different states

| Compound at different states | P (ns) | H (ns) | HF (ns) | M (ns) | MD (ns) |
|------------------------------|--------|--------|---------|--------|---------|
| DBBO                         | 10.77  | 6.03   | 10.27   | 7.76   | 1.55    |
| DBBT                         | 6.45   | 2.22   | 4.74    | 3.18   | 1.50    |

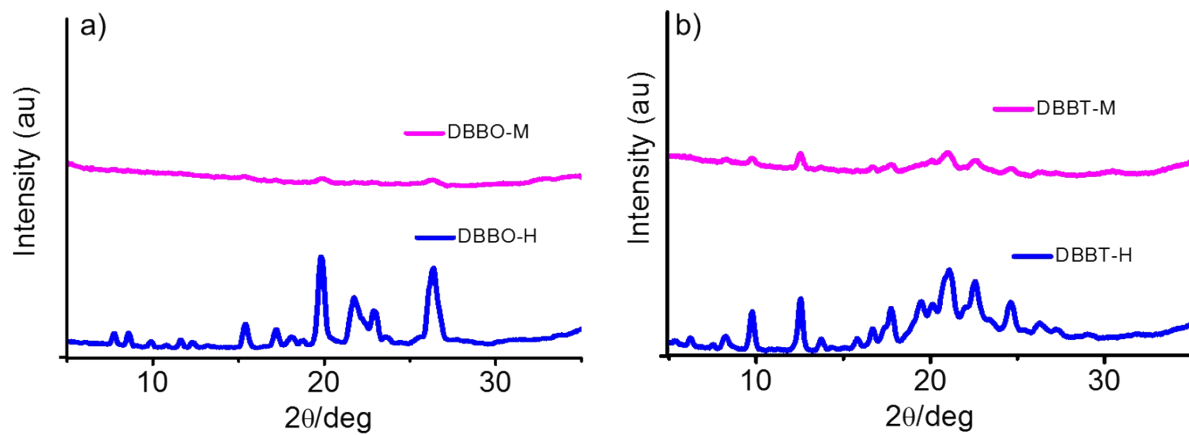

**Fig.S7:** PXRD pattern under different conditions of a) **DBBO** and b) **DBBT**; H – heated sample and M – ground H sample.
